# Supplementary material for: Fabrication of a polyaniline/MoS2 nanocomposite using self-stabilized dispersion polymerization for supercapacitors with high energy density
Source: Royal Society of Chemistry journal article supplement (doi:10.1039/c6ra00797j), 2016-01-01
Supplement: c6ra00797j1.pdf [file c6ra00797j1.pdf]

## Supporting Information for

### Fabrication of Polyaniline/MoS<sub>2</sub> Nanocomposite using Self-Stabilized Dispersion Polymerization for Supercapacitors with High Energy Density

Minkyu Kim,<sup>†</sup> Yun Ki Kim,<sup>†</sup> Jihoo Kim,<sup>†</sup> Sunghun Cho,<sup>†,‡</sup> Gyeongseop Lee,<sup>†</sup> and Jyongsik Jang<sup>\*,†</sup>

<sup>†</sup>School of Chemical and Biological Engineering, College of Engineering, Seoul National University (SNU), 599 Gwanangno, Gwanak-gu, Seoul, 151-742 (Korea)

<sup>‡</sup> Department of Chemistry and Biochemistry, Department of Materials Science and Engineering, and California NanoSystems Institute, University of California, Los Angeles, California 90095-1569, USA

\*Corresponding author: Jyongsik Jang, jsjang@plaza.snu.ac.kr, Tel: (+82) 2-880-7069, Fax: (+82) 2-888-7295

#### Table of Contents

|                                                                                                                                           |   |
|-------------------------------------------------------------------------------------------------------------------------------------------|---|
| 1. SEM image of pure PANI .....                                                                                                           | 2 |
| 2. CV curve of pristine MoS <sub>2</sub> nanosheet .....                                                                                  | 3 |
| 3. Galvanostatic charge/discharge curve of pristine MoS <sub>2</sub> nanosheet .....                                                      | 4 |
| 4. Galvanostatic charge/discharge curves of pristine PANI/MoS <sub>2</sub> nanocomposite .....                                            | 5 |
| 5. Table of current densities, specific capacitances, energy densities, and power densities for PANI/MoS <sub>2</sub> nanocomposite ..... | 6 |

### 1. SEM image of pure PANI

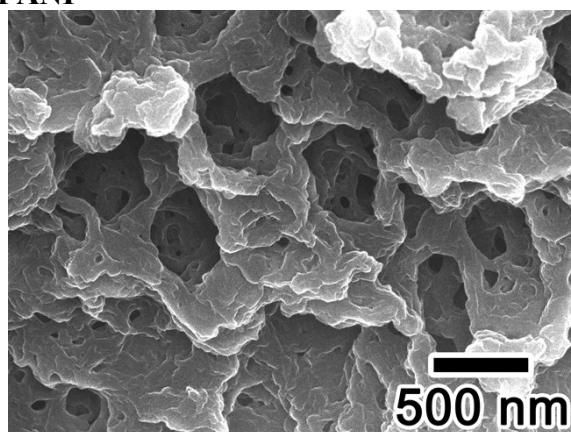

**Figure S1.** SEM image of pure PANI synthesized by self-stabilized dispersion polymerization method.

## 2. CV curve of pristine MoS<sub>2</sub> nanosheet

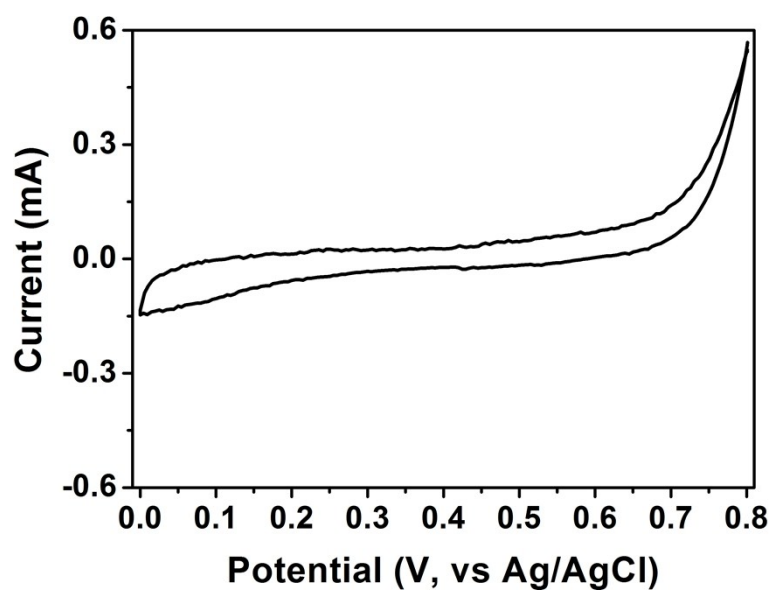

**Figure S2.** CV curve of pristine MoS<sub>2</sub> nanosheet at a scan rate of 5 mV s<sup>-1</sup>.

### 3. Galvanostatic charge/discharge curve of pristine MoS<sub>2</sub> nanosheet

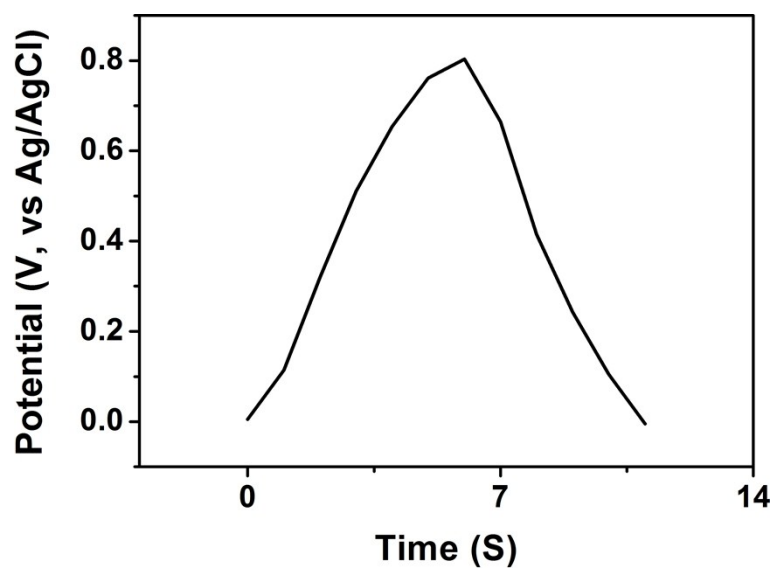

**Figure S3.** Galvanostatic charge/discharge curve of pristine MoS<sub>2</sub> nanosheet at a current density of 0.6 A g<sup>-1</sup>.

#### 4. Galvanostatic charge/discharge curves of PANI/MoS<sub>2</sub> nanocomposite

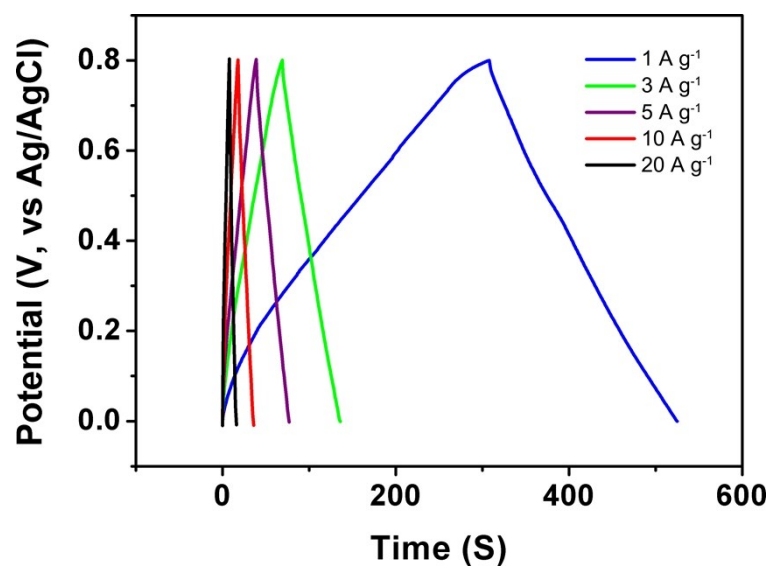

**Figure S4.** Galvanostatic charge/discharge curves of PANI/MoS<sub>2</sub> nanocomposite at current densities of 1, 3, 5, 10, and 20 A g<sup>-1</sup>.

**5. Table of current densities, specific capacitances, energy densities, and power densities for PANI/MoS<sub>2</sub> nanocomposite**

**Table S1.** Current densities, specific capacitances, energy densities, and power densities for PANI/MoS<sub>2</sub> nanocomposite.

| Current density<br>(A g <sup>-1</sup> ) | Specific capacitance<br>(F g <sup>-1</sup> ) | Energy density<br>(Wh kg <sup>-1</sup> ) | Power density<br>(W kg <sup>-1</sup> ) |
|-----------------------------------------|----------------------------------------------|------------------------------------------|----------------------------------------|
| 1                                       | 270                                          | 6.0                                      | 100                                    |
| 3                                       | 246                                          | 5.5                                      | 300                                    |
| 5                                       | 231                                          | 5.1                                      | 500                                    |
| 10                                      | 209                                          | 4.7                                      | 1000                                   |
| 20                                      | 175                                          | 3.8                                      | 2000                                   |
